# Supplementary material
Source: PubMed Central journal article supplement (PMC3472556)
Supplement: Supp_Fig1.pdf [file Supp_Fig1.pdf]

## Supplementary Data

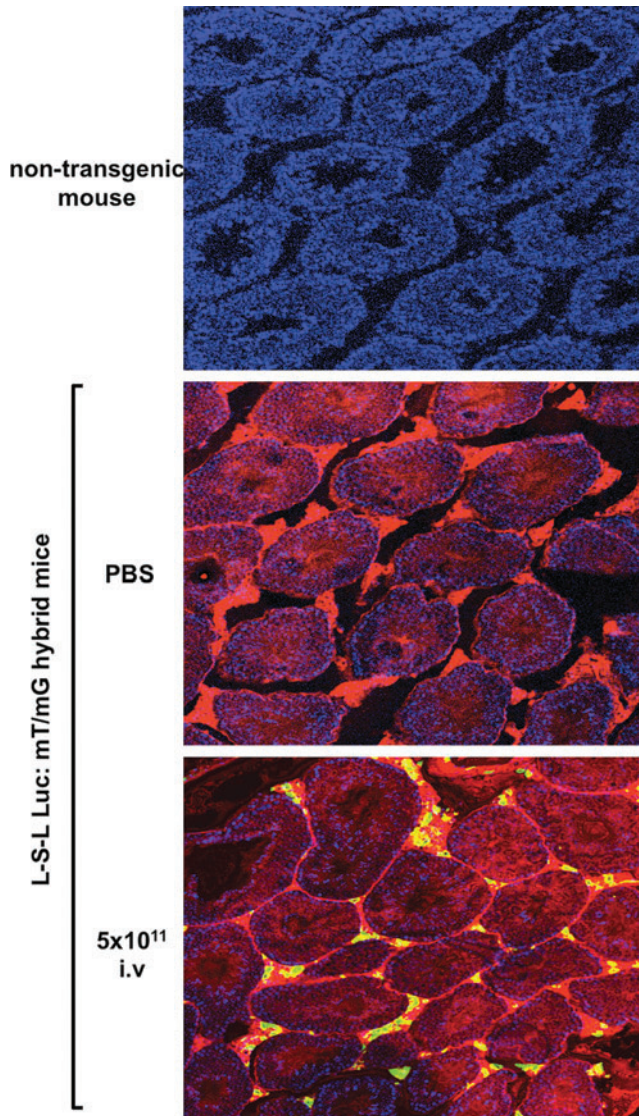

**SUPPLEMENTARY FIG. S1.** Reporter gene monitoring of the testes after Cre vector injection. Confocal images of select tissue sections from mice injected with PBS or scAAV9-Cre by the intravenous route. Tissues are counterstained for nuclei with DAPI. Nontransgenic mice do not express fluorescent proteins and show only DAPI stain.
